# Supplementary material for: Potent human broadly SARS-CoV-2–neutralizing IgA and IgG antibodies effective against Omicron BA.1 and BA.2
Source: PubMed Central journal article supplement — J Exp Med. 2022 Jun 15;219(7):e20220638. doi: 10.1084/jem.20220638 (PMC9206116; doi:10.1084/jem.20220638), 2022-06-15

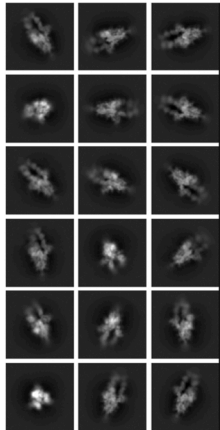

15,732  
movies

↓ *Motion & CTF correction*

15,324  
mic.

↓ *Picking & 2D classification*  
pixel size = 0.86 Å  
box size = 440 px<sup>3</sup>

1366,172 part.

↓ *Ab initio reconstruction*  
*3D classification*

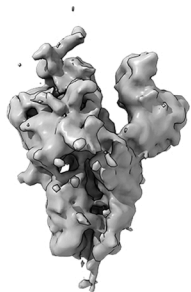

154,574 part.

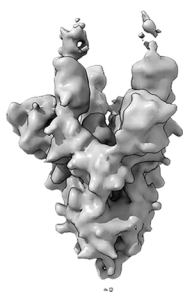

498,560 part.

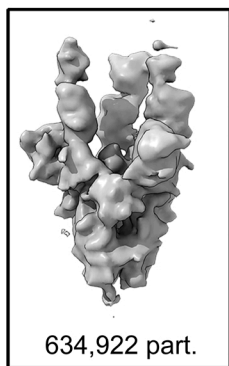

634,922 part.

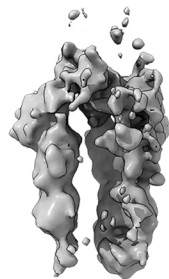

78,116 part.

GSFSC Resolution: 2.82Å

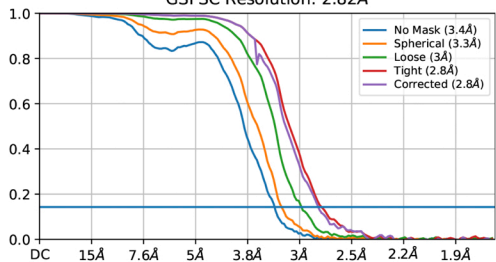

↓ *Non-Uniform Refinement*  
*(optimize defocus + CTF)*  
sym = C1

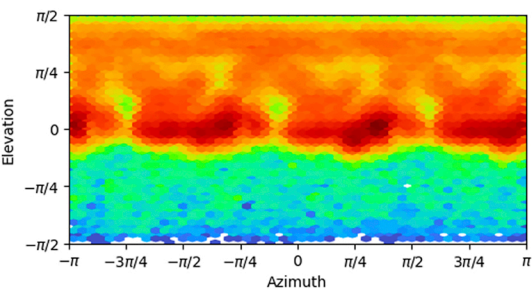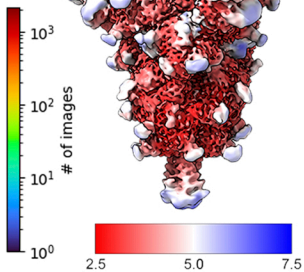

Supplement: JEM_20220638_DataS1.pdf [file JEM_20220638_DataS1.pdf]
